# Supplementary material
Source: PubMed Central journal article supplement (PMC4215233)
Supplement: supp_M114.593210_jbc.M114.593210-1.pdf [file supp_M114.593210_jbc.M114.593210-1.pdf]

**Supplementary Table 1. The chromatographic and mass spectrometric parameters for the LC/MS lipidomics study**

| <b>Chromatographic parameters</b> |                                                                                                 |
|-----------------------------------|-------------------------------------------------------------------------------------------------|
| Column                            | Waters Acquity UPLC BEH C18, 2.1x100mm, 1.7 $\mu$ M                                             |
| Column temperature                | 45°C                                                                                            |
| Autosampler temperature           | 10°C                                                                                            |
| Mobile phase                      | A= Water with 10mM Ammonium formate pH4 adjusted<br>by formic acid<br>B= Acetonitrile           |
| Gradient                          | 0% B (0-0.25min)<br>5% B (0.25-1min)<br>20% B (1-10min)<br>60% B (10-22min)<br>99% B (22-26min) |
| Flow rate                         | 0.45 mL/min                                                                                     |
| Injection volume                  | 12 $\mu$ l                                                                                      |
| <b>MS parameters</b>              |                                                                                                 |
| Polarity                          | Negative                                                                                        |
| Capillary voltage                 | 4.0kV                                                                                           |
| Sheath gas flow rate              | 10 L/min                                                                                        |
| Sheath gas temperature            | 350°C                                                                                           |
| Drying gas flow rate (nitrogen)   | 7 L/min                                                                                         |
| Drying gas temperature            | 300°C                                                                                           |
| Nebuilizer gas (nitrogen)         | 45 psi                                                                                          |
| Fragmentor voltage                | 140V                                                                                            |
| Nozzle voltage                    | 0V                                                                                              |
| Scanning range                    | 50-1700 m/z                                                                                     |

**Supplementary Table 2: Regulation of fatty acids in A375 cells after co-culture with subcutaneous adipocytes**

| Compound                                             | Regulation | Accurate MS | Retention Time (min) |
|------------------------------------------------------|------------|-------------|----------------------|
| 10E-nonadecenoic acid                                | down       | 296.26810   | 18.25829             |
| 10-Hydroxy-3,7-dimethyl-2E,6E-decadienoic acid       | down       | 212.13956   | 9.50828              |
| 10-hydroxy-8Z-Decene-4,6-diynoic acid                | down       | 402.12634   | 10.54891             |
| 10-tridecynoic acid                                  | down       | 210.16030   | 9.04052              |
| 10Z,13Z-nonadecadienoic acid                         | up         | 588.51120   | 18.54392             |
| 12Z-heneicosenoic acid                               | down       | 370.30423   | 24.77153             |
| 15-octadecene-9,11,13-triynoic acid                  | down       | 690.39825   | 25.06367             |
| 16-heptadecynoic acid                                | down       | 532.44700   | 23.31169             |
| 16Z-tricosenoic acid                                 | down       | 398.33755   | 22.24143             |
| 17Z-pentacosenoic acid                               | down       | 426.36868   | 23.42075             |
| 2E,6E,8E,10E-dodecatetraenoic acid                   | down       | 384.22906   | 16.97578             |
| 2E,6Z,8Z,12E-hexadecatetraenoic acid                 | down       | 294.18090   | 9.11902              |
| 2-octynoic acid                                      | down       | 280.16544   | 9.09935              |
| 2-pentadecenoic acid                                 | up         | 526.43020   | 18.54478             |
| 2Z,4E-nonadienoic acid                               | down       | 508.29800   | 8.29309              |
| 3,9,15-Docosatriynoic acid                           | down       | 1030.73990  | 24.87174             |
| 3-decylenic acid                                     | down       | 216.13434   | 9.05965              |
| 3-octadecynoic acid                                  | down       | 280.23880   | 18.02790             |
| 4,7,10,13,16-Docosapentaynoic acid                   | down       | 640.34090   | 24.46954             |
| 4,7,10,13-docosatetraenoic acid                      | up         | 378.27872   | 17.68587             |
| 4-heptynoic acid                                     | down       | 252.13496   | 9.09544              |
| 4Z,7Z,10Z,13Z,16Z,19Z,22Z,25Z-octacosaoctaenoic acid | up         | 408.30133   | 20.90376             |
| 5,8,11-dodecatriynoic acid                           | down       | 376.16882   | 13.44884             |
| 5,9,12-octadecatrienoic acid                         | down       | 324.22543   | 18.75168             |
| 6,9,12,15,18,21-Tetracosahexaynoic acid              | down       | 344.17657   | 13.23476             |
| 6,9,12-Eicosatriynoic acid                           | down       | 346.20970   | 15.46260             |
| 6E,8E,12E,14E-Hexadecatetraen-10-ynoic acid          | down       | 534.29645   | 19.23109             |
| Arachidic acid                                       | up         | 312.30063   | 22.30968             |
| Capric acid                                          | down       | 562.45496   | 25.69240             |
| Caproic acid                                         | down       | 116.08536   | 0.92467              |
| cis, cis-stillingic acid                             | down       | 382.23645   | 14.28399             |
| cis,cis-dodeca-3,6-dienoic acid                      | down       | 196.14511   | 9.66053              |
| cis-erucic acid                                      | down       | 384.31958   | 21.92792             |

\*Only fatty acids with statistically significant effect ( $p < 0.05$ ) and fold change  $> 2.0$  are presented in the table as described in Materials and methods section

**Supplementary Table 2: Regulation of fatty acids in A375 cells after co-culture with subcutaneous adipocytes (cont'd)**

| <b>Compound</b>                       | <b>Regulation</b> | <b>Accurate MS</b> | <b>Retention Time (min)</b> |
|---------------------------------------|-------------------|--------------------|-----------------------------|
| Crotonic acid                         | down              | 86.03724           | 0.93133                     |
| Heptylic acid                         | down              | 390.29890          | 17.72229                    |
| Margaric acid                         | down              | 270.25293          | 18.28515                    |
| Palmitic acid                         | up                | 256.24260          | 17.96330                    |
| Pelargonic acid                       | down              | 362.26822          | 15.29633                    |
| trans,trans-hepta-2,4,6-trienoic acid | up                | 418.15960          | 7.68239                     |
| trans-tetradec-11-enoic acid          | down              | 272.19202          | 10.31420                    |
| Undecylic acid                        | down              | 186.16025          | 7.37731                     |

\*Only fatty acids with statistically significant effect ( $p < 0.05$ ) and fold change  $> 2.0$  are presented in the table as described in Materials and methods section
